# Supplementary material for: Public Perceptions of Community Pharmacy-Based Naloxone Services: A National Cross-Sectional Survey
Source: MDPI journal article supplement (doi:10.3390/pharmacy10060171), 2022-12-09
Supplement: s1 [file s1]

## Survey Instrument

### Public Perceptions of Community Pharmacy-Based Naloxone Services: A National Cross-Sectional Survey

---

#### I. INFORMATION ABOUT YOU

---

1. Enter your age in years: \_\_\_\_\_
2. Please indicate your sex  
☐ Male      ☐ Female      ☐ Non-binary      ☐ Other      ☐ Prefer not to answer
3. With which race do you identify most closely?  
☐ Black/African American      ☐ Asian or Pacific Islander  
☐ Native American or Alaska Native      ☐ White/Caucasian      ☐ Other  
☐ Prefer not to answer
4. Are you of Hispanic, Latino(a), or Spanish origin?  
☐ Yes      ☐ No      ☐ Prefer not to answer
5. What is the highest level of education you have completed?  
☐ Some high school, no diploma  
☐ High school graduate, diploma or the equivalent (for example: GED)  
☐ Some college credit, no degree      ☐ Trade/technical/vocational training      ☐ Associate degree  
☐ Bachelor's degree      ☐ Master's degree      ☐ Professional degree  
☐ Doctorate degree
6. Please indicate your annual household income:  
☐ Less than \$20,000      ☐ \$20,000-\$49,999      ☐ \$50,000-\$99,999      ☐ \$100,000-\$149,999  
☐ \$150,000 or more
7. Are you employed in a healthcare profession or non-healthcare profession?  
☐ Healthcare profession      ☐ Non-healthcare profession      ☐ Not employed
8. Please indicate the State in which you reside:  
☐ Select from dropdown list of states, territories, and DC      ☐ Prefer not to answer
9. Please indicate the Zip Code in which you reside: \_\_\_\_\_
10. Have you or someone you have known been personally or professionally affected by opioid use disorder (OUD) or substance misuse?  
☐ Yes      ☐ No
11. Are you currently using prescription opioid medications or have you been prescribed opioid medications in the past for the treatment of pain or for post-surgery management? Prescription opioid medications may include morphine, hydrocodone, Vicodin®, Norco®, or others.  
☐ Yes      ☐ No

---

#### II. GENERAL KNOWLEDGE ABOUT OPIOID OVERDOSE AND NALOXONE

---

1. Before taking this survey, were you aware of naloxone, also commonly referred to as Narcan®, and what it is used for?  
☐ Yes      ☐ No
2. What is naloxone used for?  
☐ To reverse the effects of an opioid overdose (e.g. heroin, Oxycodone, Vicodin, methadone)  
☐ To reverse the effects of an amphetamine overdose  
☐ To reverse the effects of a cocaine overdose      ☐ To reverse the effects of any overdose

3. [Display after Q2 has been answered] Naloxone, or Narcan® is a medication used for the treatment of opioid overdose and can help to reverse an opioid overdose. Were you aware that in all 50 states you can obtain this medication without a prescription by speaking with your pharmacist?  
☐Yes ☐No
4. Which of the following factors increase the risk of an opioid overdose? Please check all that apply.  
☐Taking larger than usual doses of opioids ☐Increase in opioid purity  
☐Using an opioid again after not having used for a while ☐A long history of opioid use  
☐Using an opioid when no one else is present around  
☐Using an opioid again after a detoxification treatment
5. Which of the following are indicators of an opioid overdose? Please check all that apply.  
☐Having bloodshot eyes ☐Slow or shallow breathing ☐Unresponsive  
☐Lips, hands or feet turning blue ☐Loss of consciousness ☐Deep snoring  
☐Very small pupils ☐Agitated behavior ☐Rapid heartbeat
6. Which of the following should be done when managing an opioid overdose? Please check all that apply.  
☐Stay with the person until an ambulance arrives ☐Call an ambulance  
☐Inject the person with salt solution or milk ☐Give mouth to mouth resuscitation  
☐Give stimulants (e.g. cocaine or black coffee) ☐Check for breathing  
☐Give naloxone (opioid overdose antidote) ☐Put the person in a bath of cold water  
☐Check for blocked airways (nose and mouth) ☐Put the person in bed to sleep it off  
☐Place the person in the recovery position (on their side with mouth clear)
7. How can Naloxone be administered? Please check all that apply.  
☐Into the nose (intranasal) ☐Into a muscle (intramuscular) ☐Into a vein (intravenous)  
☐Under the skin (subcutaneous) ☐Swallowing a liquid ☐Swallowing a tablet  
☐Don't know
8. How long does naloxone take to start having an effect?  
☐2-5 minutes ☐6-10 minutes ☐11-20 minutes ☐21-40 minutes  
☐Don't know
9. How long do the effects of naloxone last for?  
☐Less than 20 minutes ☐About 1 hour ☐1 to 6 hours ☐6 to 12 hours  
☐Don't know
10. Which statements are CORRECT about naloxone and opioid overdose? Please check all that apply.  
☐If the first dose of naloxone has no effect a second dose can be given  
☐There is no need to call for an ambulance if I know how to manage an overdose  
☐Someone can overdose again even after having received naloxone  
☐Naloxone can provoke withdrawal symptoms  
☐After recovering from an opioid overdose, the person must not take any heroin, but it is OK for them to drink alcohol or take sleeping pills

---

### III. GENERAL OPINIONS ABOUT NALOXONE

---

1. On a scale of 1-5, with 1 being strongly disagree and 5 being strongly agree, please indicate your level of agreement or disagreement with the following statements.

| Questions                                                                                                | (1)<br>Strongly<br>Disagree | Disagree              | Neutral               | Agree                 | (5)<br>Strongly<br>Agree |
|----------------------------------------------------------------------------------------------------------|-----------------------------|-----------------------|-----------------------|-----------------------|--------------------------|
| Naloxone provides opioid users with a second chance at life                                              | <input type="radio"/>       | <input type="radio"/> | <input type="radio"/> | <input type="radio"/> | <input type="radio"/>    |
| Naloxone may cause MORE opioid overdoses                                                                 | <input type="radio"/>       | <input type="radio"/> | <input type="radio"/> | <input type="radio"/> | <input type="radio"/>    |
| Having naloxone available ENABLES people who misuse opioids                                              | <input type="radio"/>       | <input type="radio"/> | <input type="radio"/> | <input type="radio"/> | <input type="radio"/>    |
| Naloxone should be made available to anyone concerned about opioid overdose                              | <input type="radio"/>       | <input type="radio"/> | <input type="radio"/> | <input type="radio"/> | <input type="radio"/>    |
| If my pharmacist speaks to me about naloxone, I would like to be moved to a private area in the pharmacy | <input type="radio"/>       | <input type="radio"/> | <input type="radio"/> | <input type="radio"/> | <input type="radio"/>    |
| If my doctor prescribed me opioids, I would NOT need naloxone                                            | <input type="radio"/>       | <input type="radio"/> | <input type="radio"/> | <input type="radio"/> | <input type="radio"/>    |

---

#### IV. HOW TO RECEIVE NALOXONE FROM THE PHARMACY

---

- On a scale of 1-5, with 1 being strongly disagree and 5 being strongly agree, please indicate your level of agreement or disagreement with the following statements.

What things make it DIFFICULT to receive naloxone from the pharmacy?

| Questions                                                                           | (1)<br>Strongly<br>Disagree | Disagree              | Neutral               | Agree                 | (5)<br>Strongly<br>Agree |
|-------------------------------------------------------------------------------------|-----------------------------|-----------------------|-----------------------|-----------------------|--------------------------|
| Cost of naloxone is too high                                                        | <input type="radio"/>       | <input type="radio"/> | <input type="radio"/> | <input type="radio"/> | <input type="radio"/>    |
| It is uncomfortable asking the pharmacist for naloxone                              | <input type="radio"/>       | <input type="radio"/> | <input type="radio"/> | <input type="radio"/> | <input type="radio"/>    |
| It is uncomfortable asking the pharmacist for naloxone                              | <input type="radio"/>       | <input type="radio"/> | <input type="radio"/> | <input type="radio"/> | <input type="radio"/>    |
| Not wanting my family/friends to know that I was getting naloxone                   | <input type="radio"/>       | <input type="radio"/> | <input type="radio"/> | <input type="radio"/> | <input type="radio"/>    |
| Not wanting people I know from my community/neighborhood to see me getting naloxone | <input type="radio"/>       | <input type="radio"/> | <input type="radio"/> | <input type="radio"/> | <input type="radio"/>    |
| Fear of the pharmacist having a negative view of me if I ask for naloxone           | <input type="radio"/>       | <input type="radio"/> | <input type="radio"/> | <input type="radio"/> | <input type="radio"/>    |
| It will take too long to receive naloxone from the pharmacy, e.g. long wait times   | <input type="radio"/>       | <input type="radio"/> | <input type="radio"/> | <input type="radio"/> | <input type="radio"/>    |

2. What do you think would be the BEST way for a pharmacist to ask you if you wanted naloxone when you pick up a prescription for opioid pain medications?
- ☐ Universal offer – pharmacist tells all customers at the pharmacy that naloxone is available
- ☐ Targeted offer – pharmacist tells only those customers at higher risk of overdose about naloxone
- ☐ General advertisement – pharmacist posts a flyer so that all customers in the pharmacy are aware naloxone is available

---

**V. OPINIONS ABOUT PHARMACISTS AND NALOXONE**

---

1. On a scale of 1-5, with 1 being strongly disagree and 5 being strongly agree, please indicate your level of agreement or disagreement with the following statements.

| Questions                                                                                      | (1)<br>Strongly<br>Disagree | Disagree              | Neutral               | Agree                 | (5)<br>Strongly<br>Agree |
|------------------------------------------------------------------------------------------------|-----------------------------|-----------------------|-----------------------|-----------------------|--------------------------|
| I am confident that pharmacists have sufficient KNOWLEDGE to dispense naloxone                 | <input type="radio"/>       | <input type="radio"/> | <input type="radio"/> | <input type="radio"/> | <input type="radio"/>    |
| I am confident that pharmacists have sufficient TRAINING to dispense naloxone                  | <input type="radio"/>       | <input type="radio"/> | <input type="radio"/> | <input type="radio"/> | <input type="radio"/>    |
| I support community pharmacists dispensing naloxone                                            | <input type="radio"/>       | <input type="radio"/> | <input type="radio"/> | <input type="radio"/> | <input type="radio"/>    |
| I prefer receiving naloxone from my pharmacist rather than my doctor                           | <input type="radio"/>       | <input type="radio"/> | <input type="radio"/> | <input type="radio"/> | <input type="radio"/>    |
| I would only get naloxone from my pharmacy if my doctor recommended it first                   | <input type="radio"/>       | <input type="radio"/> | <input type="radio"/> | <input type="radio"/> | <input type="radio"/>    |
| If I received naloxone from my pharmacy, I would NOT want them to tell my doctor               | <input type="radio"/>       | <input type="radio"/> | <input type="radio"/> | <input type="radio"/> | <input type="radio"/>    |
| I prefer to receive naloxone from a more clinical setting, like a doctor's office              | <input type="radio"/>       | <input type="radio"/> | <input type="radio"/> | <input type="radio"/> | <input type="radio"/>    |
| The pharmacy is an appropriate place to provide naloxone                                       | <input type="radio"/>       | <input type="radio"/> | <input type="radio"/> | <input type="radio"/> | <input type="radio"/>    |
| I worry how the pharmacy will handle my naloxone records                                       | <input type="radio"/>       | <input type="radio"/> | <input type="radio"/> | <input type="radio"/> | <input type="radio"/>    |
| There is not enough privacy in the pharmacy                                                    | <input type="radio"/>       | <input type="radio"/> | <input type="radio"/> | <input type="radio"/> | <input type="radio"/>    |
| I would prefer to receive naloxone from an anonymous source, like the public health department | <input type="radio"/>       | <input type="radio"/> | <input type="radio"/> | <input type="radio"/> | <input type="radio"/>    |

---

**VI. YOUR ABILITY TO MANAGE AN OPIOID OVERDOSE**

---

On a scale of 1-5, with 1 being strongly disagree and 5 being strongly agree, please indicate your level of agreement or disagreement with the following statements.

1. Competencies to Manage an Opioid Overdose

| Questions                                                                                        | (1)<br>Strongly<br>Disagree | Disagree              | Neutral               | Agree                 | (5)<br>Strongly<br>Agree |
|--------------------------------------------------------------------------------------------------|-----------------------------|-----------------------|-----------------------|-----------------------|--------------------------|
| I already have enough information about how to manage an overdose                                | <input type="radio"/>       | <input type="radio"/> | <input type="radio"/> | <input type="radio"/> | <input type="radio"/>    |
| I am already able to inject naloxone into someone who has overdosed                              | <input type="radio"/>       | <input type="radio"/> | <input type="radio"/> | <input type="radio"/> | <input type="radio"/>    |
| I would be able to check that someone who has overdosed was breathing properly                   | <input type="radio"/>       | <input type="radio"/> | <input type="radio"/> | <input type="radio"/> | <input type="radio"/>    |
| I am going to need more training before I would feel confident to help someone who has overdosed | <input type="radio"/>       | <input type="radio"/> | <input type="radio"/> | <input type="radio"/> | <input type="radio"/>    |
| I would be able to perform mouth to mouth resuscitation to someone who has overdosed             | <input type="radio"/>       | <input type="radio"/> | <input type="radio"/> | <input type="radio"/> | <input type="radio"/>    |
| I would be able to perform chest compressions to someone who has overdosed                       | <input type="radio"/>       | <input type="radio"/> | <input type="radio"/> | <input type="radio"/> | <input type="radio"/>    |
| If someone overdoses, I would know what to do to help them                                       | <input type="radio"/>       | <input type="radio"/> | <input type="radio"/> | <input type="radio"/> | <input type="radio"/>    |
| I would be able to place someone who has overdosed in the recovery position                      | <input type="radio"/>       | <input type="radio"/> | <input type="radio"/> | <input type="radio"/> | <input type="radio"/>    |
| I know very little about how to help someone who has overdosed                                   | <input type="radio"/>       | <input type="radio"/> | <input type="radio"/> | <input type="radio"/> | <input type="radio"/>    |
| I would be able to deal effectively with an overdose                                             | <input type="radio"/>       | <input type="radio"/> | <input type="radio"/> | <input type="radio"/> | <input type="radio"/>    |

2. Concerns About Managing an Opioid Overdose

| Questions                                                                             | (1)<br>Strongly<br>Disagree | Disagree              | Neutral               | Agree                 | (5)<br>Strongly<br>Agree |
|---------------------------------------------------------------------------------------|-----------------------------|-----------------------|-----------------------|-----------------------|--------------------------|
| I would be afraid of giving naloxone in case the person becomes aggressive afterwards | <input type="radio"/>       | <input type="radio"/> | <input type="radio"/> | <input type="radio"/> | <input type="radio"/>    |
| I would be afraid of doing something wrong in an overdose situation                   | <input type="radio"/>       | <input type="radio"/> | <input type="radio"/> | <input type="radio"/> | <input type="radio"/>    |

|                                                                                                    |                       |                       |                       |                       |                       |
|----------------------------------------------------------------------------------------------------|-----------------------|-----------------------|-----------------------|-----------------------|-----------------------|
| I would be reluctant to use naloxone for fear of causing withdrawal symptoms                       | <input type="radio"/> |
| I would be concerned about calling emergency services in case the police come around               | <input type="radio"/> |
| If I tried to help someone who has overdosed, I might accidentally hurt them                       | <input type="radio"/> |
| I would feel safer if I knew that naloxone was around                                              | <input type="radio"/> |
| I would be afraid of suffering a needle stick injury if I had to give someone a naloxone injection | <input type="radio"/> |
| Needles frighten me and I wouldn't be able to give someone an injection of naloxone                | <input type="radio"/> |

### 3. Readiness to Intervene in an Opioid Overdose

| Questions                                                                                     | (1)<br>Strongly<br>Disagree | Disagree              | Neutral               | Agree                 | (5)<br>Strongly<br>Agree |
|-----------------------------------------------------------------------------------------------|-----------------------------|-----------------------|-----------------------|-----------------------|--------------------------|
| Everyone at risk of witnessing an overdose should be given a naloxone supply                  | <input type="radio"/>       | <input type="radio"/> | <input type="radio"/> | <input type="radio"/> | <input type="radio"/>    |
| I couldn't just watch someone overdose, I would have to do something to help                  | <input type="radio"/>       | <input type="radio"/> | <input type="radio"/> | <input type="radio"/> | <input type="radio"/>    |
| If someone overdoses, I would call an ambulance but I wouldn't be willing to do anything else | <input type="radio"/>       | <input type="radio"/> | <input type="radio"/> | <input type="radio"/> | <input type="radio"/>    |
| Family and friends of drug users should be prepared to deal with an overdose                  | <input type="radio"/>       | <input type="radio"/> | <input type="radio"/> | <input type="radio"/> | <input type="radio"/>    |
| If I saw an overdose, I would panic and not be able to help                                   | <input type="radio"/>       | <input type="radio"/> | <input type="radio"/> | <input type="radio"/> | <input type="radio"/>    |
| If I witnessed an overdose, I would call an ambulance straight away                           | <input type="radio"/>       | <input type="radio"/> | <input type="radio"/> | <input type="radio"/> | <input type="radio"/>    |
| I would stay with the overdose victim until help arrives                                      | <input type="radio"/>       | <input type="radio"/> | <input type="radio"/> | <input type="radio"/> | <input type="radio"/>    |
| If I saw an overdose, I would feel nervous, but I would still take the necessary actions      | <input type="radio"/>       | <input type="radio"/> | <input type="radio"/> | <input type="radio"/> | <input type="radio"/>    |
| I will do whatever is necessary to save someone's life in an overdose situation               | <input type="radio"/>       | <input type="radio"/> | <input type="radio"/> | <input type="radio"/> | <input type="radio"/>    |

|                                                      |                       |                       |                       |                       |                       |
|------------------------------------------------------|-----------------------|-----------------------|-----------------------|-----------------------|-----------------------|
| If someone overdoses, I want to be able to help them | <input type="radio"/> |
|------------------------------------------------------|-----------------------|-----------------------|-----------------------|-----------------------|-----------------------|

---

**VII. CONCLUSION**

---

Thank you so much for your time! We appreciate your thoughts and feedback regarding naloxone. If you would like more information regarding Narcan, feel free to visit <https://www.narcan.com/>
